# Supplementary material for: Reinforcement Strain and Potential Failure Surface of Geogrid Reinforced Soil-Retaining Wall under Horizontal Seismic Loading
Source: Hindawi journal article supplement (doi:10.1155/2020/8864256), 2020-10-29
Supplement: f1 [file 8864256.f1.zip]

Archive with 1 entries (1 files):
- 8864256.f1/Reinforcement strain and potential failure surface.zip
